# Supplementary material for: The effect of long-term volleyball training on the level of somatic parameters of female volleyball players in various age categories
Source: PeerJ. 2020 Oct 2;8:e9992. doi: 10.7717/peerj.9992 (PMC7537616; doi:10.7717/peerj.9992)
Supplement: Supplemental Information 1 [file peerj-08-9992-s001.xlsx]

## Sheet: CG
1. Name	BH cm	AGE years	BM kg	TBW l	TBW %	BF kg	FFM kg	SMM kg	SMM %	BF %	VFA (cm2)
1	148.2	11.3	36.4	22.1	60.7143	6.2	30.2	15.8	43.4066	17	27.7
2	152.2	11	39.9	24.1	60.401	6.8	33.1	17.5	43.8596	17.1	28.1
3	145.5	11.4	31.5	19.4	61.5873	4.8	26.7	13.6	43.1746	15.4	20.9
4	150.3	11.5	45.1	26.8	59.4235	8.6	36.5	19.6	43.459	19	35.8
5	151	11	37.2	23	61.828	5.8	31.4	16.6	44.6237	15.5	21.7
6	160	11.7	42.7	26.6	62.2951	6.4	36.3	19.3	45.1991	15.1	29.3
7	153	11.8	39.8	22.1	55.5276	9.5	30.3	15.7	39.4472	23.9	42.9
8	161.5	12.3	58.9	34.1	57.8947	12.4	46.5	25.6	43.4635	21	49.6
9	158	11.8	43.4	27.7	63.8249	5.5	37.9	20.1	46.3134	12.7	26.7
10	166.5	12.3	59.1	34	57.5296	12.6	46.5	25.4	42.978	21.3	51.9
11	161	12.5	65.1	31.6	48.5407	21.8	43.3	23.4	35.9447	33.4	97.8
12	157	12.4	38.4	24.2	63.0208	5.2	33.2	17.3	45.0521	13.6	26.6
13	167.3	11.8	66.6	35.8	53.7538	17.6	49	26.8	40.2402	26.4	70.9
14	156	11.9	50.2	28.6	56.9721	10.9	39.3	21	41.8327	21.8	45.8
15	148	11.8	32.2	21.3	66.1491	2.9	29.3	14.9	46.2733	9	19.8
16	142	11.8	34.3	19.6	57.1429	7.4	26.9	13.7	39.9417	21.7	32.4
17	162	12.5	55.4	32.3	58.3032	11	44.4	24.3	43.8628	19.8	40.1
18	159	12.2	41.5	25.1	60.4819	7.1	34.4	18.1	43.6145	17	32.5
19	169	12.2	44.3	28.4	64.1084	5.5	38.8	21	47.4041	12.5	20.5
20	155	11.9	57.3	28.2	49.2147	18.9	38.4	20.7	36.1257	33	85.4
21	155	11.9	39.3	25.6	65.1399	4.1	35.2	18.6	47.3282	10.5	19.9
22	151	12.3	37.7	22.2	58.8859	7.3	30.4	15.7	41.6446	19.5	32.1
23	152	12.3	40.1	25.8	64.3392	4.9	35.2	18.8	46.8828	12.2	19.4
24	166	12.3	50	29.9	59.8	9.3	40.7	21.7	43.4	18.5	45
25	156	12.6	44	27.3	62.0455	6.6	37.4	20.2	45.9091	15.1	24.9
26	159	12	49.6	29.6	59.6774	9.1	40.5	22.1	44.5565	18.3	34.5
27	154	12.3	43.4	25.3	58.2949	8.8	34.6	18.4	42.3963	20.3	36.2
28	159	12.5	41.3	24.4	59.0799	7.8	33.5	17.4	42.1308	18.8	36.6
29	146	12.2	34.5	23	66.6667	2.9	31.6	16.6	48.1159	8.4	10.7
30	146	11.8	39.5	20.7	52.4051	11.2	28.3	14.7	37.2152	28.3	43.9
31	155	11.9	41.9	24.5	58.4726	8.5	33.4	17.5	41.7661	20.2	40.2
32	157	12.5	51	26.8	52.549	14.5	36.5	19.4	38.0392	28.4	59.5
33	143	12.4	33.2	18.9	56.9277	7.2	26	13.1	39.4578	21.8	32.1
34	165.5	12.8	58.7	33.2	56.5588	13.3	45.4	24.7	42.0784	22.6	58.7
35	159	12.9	46.1	29.4	63.7744	5.9	40.2	21.8	47.2885	12.8	23.8
36	164	12.9	54.4	33	60.6618	9.3	45.1	24.8	45.5882	17	38.3
37	159	12.7	55.9	30.5	54.5617	14	41.9	22.5	40.2504	25.1	55.3
38	151	12.6	34.4	21.3	61.9186	5.2	29.2	15.3	44.4767	15.1	19.8
39	154	12.5	43.3	25.6	59.1224	8.4	34.9	18.5	42.7252	19.4	35.4
40	165.5	12.8	45.5	28.8	63.2967	6.3	39.2	21.1	46.3736	13.8	28.9
41	172	12.8	60.9	30.5	50.0821	19.2	41.7	22.3	36.6174	31.5	88.7
42	160	12.7	56	28.5	50.8929	17.1	38.9	20.9	37.3214	30.5	76.2
43	148	12.7	38.5	24	62.3377	5.6	32.9	17.3	44.9351	14.5	24.4
44	174	12.8	69	37.3	54.058	17.9	51.1	28.1	40.7246	25.9	78.7
45	172.5	12.7	60.1	34.9	58.0699	12.5	47.6	26.1	43.4276	20.7	52.6
46	169	12.7	69.1	35.6	51.5195	20.3	48.8	26.8	38.7844	29.4	82.3
47	172.7	12.9	69	37.4	54.2029	17.8	51.2	28.2	40.8696	25.8	70.8
48	147	12.7	31.6	21.4	67.7215	2.4	29.2	15.2	48.1013	7.7	13.8
49	162	12.8	54.5	31.8	58.3486	10.9	43.6	23.9	43.8532	20	41.4
50	157	13.1	42	24.3	57.8571	8.7	33.3	17.4	41.4286	20.6	39.8
51	160	13.6	55.7	28	50.2693	17.4	38.3	20.6	36.9838	31.3	74.4
52	158.3	13.1	54.5	29.8	54.6789	13.6	40.9	22.2	40.7339	25	53.2
53	156.5	13.3	46.4	24	51.7241	13.5	32.9	17.1	36.8534	29.1	59.7
54	162	13.5	60.1	32.7	54.4093	15.2	44.9	24.5	40.7654	25.4	63.7
55	161	13.5	45.3	27	59.6026	8.4	36.9	19.6	43.2671	18.4	39
56	164	13.1	54.2	29	53.5055	14.4	39.8	21.2	39.1144	26.6	62.1
57	159.5	13.4	52.1	44.2	84.8369	1.6	50.5	34.1	65.4511	3	5
58	156	13	60.1	29.6	49.2512	19.4	40.7	22	36.6057	32.3	79.1
59	163.2	13.5	54.2	32.8	60.5166	9.3	44.9	24.6	45.3875	17.2	37
60	158	13.3	45.3	27.6	60.9272	7.6	37.7	20.2	44.5916	16.8	31.2
61	157.5	13.5	40.8	25.3	62.0098	6.1	34.7	18.6	45.5882	15	22.4
62	158.5	13.1	50	28.2	56.4	11.6	38.4	20.7	41.4	23.2	47.9
63	160	13.4	49.8	27.2	54.6185	12.5	37.3	19.9	39.9598	25.1	51.6
64	156.6	13.1	43.5	25.6	58.8506	8.5	35	18.6	42.7586	19.6	34.1
65	169	13.5	60.9	31.9	52.381	17.1	43.8	23.6	38.7521	28.1	70.9
66	162	13.3	59.6	31.3	52.5168	16.7	42.9	23.4	39.2617	28	65.7
67	162	13.7	54.5	31.4	57.6147	11.5	43	23.9	43.8532	21.1	41.5
68	149	13.4	43.2	23.1	53.4722	11.6	31.6	16.6	38.4259	26.9	49.2
69	162.5	13.5	60.5	29.5	48.7603	20	40.5	21.8	36.0331	33.1	86.9
70	147	13.7	31.6	21.4	67.7215	2.4	29.2	15.2	48.1013	7.7	13.8
71	165.5	13.8	58.7	33.2	56.5588	13.3	45.4	24.7	42.0784	22.6	58.7
72	164	13.9	54.4	33	60.6618	9.3	45.1	24.8	45.5882	17	38.3
73	165.5	13.8	45.5	28.8	63.2967	6.3	39.2	21.1	46.3736	13.8	28.9
74	172.5	13.7	60.1	34.9	58.0699	12.5	47.6	26.1	43.4276	20.7	52.6
75	169	13.7	69.1	35.6	51.5195	20.3	48.8	26.8	38.7844	29.4	82.3
76	159	13.9	46.1	29.4	63.7744	5.9	40.2	21.8	47.2885	12.8	23.8
77	172	13.8	60.9	30.5	50.0821	19.2	41.7	22.3	36.6174	31.5	88.7
78	174	13.8	69	37.3	54.058	17.9	51.1	28.1	40.7246	25.9	78.7
79	172.7	13.9	69	37.4	54.2029	17.8	51.2	28.2	40.8696	25.8	70.8
80	159	13.7	55.9	30.5	54.5617	14	41.9	22.5	40.2504	25.1	55.3
81	174.5	13.8	53.8	33	61.3383	8.9	44.9	24.2	44.9814	16.5	42.9
82	162	13.8	54.5	31.8	58.3486	10.9	43.6	23.9	43.8532	20	41.4
83	160	13.7	56	28.5	50.8929	17.1	38.9	20.9	37.3214	30.5	76.2
84	148	13.7	38.5	24	62.3377	5.6	32.9	17.3	44.9351	14.5	24.4
85	154	13.5	43.3	25.6	59.1224	8.4	34.9	18.5	42.7252	19.4	35.4
86	143	13.4	33.2	18.9	56.9277	7.2	26	13.1	39.4578	21.8	32.1
87	151	13.6	34.4	21.3	61.9186	5.2	29.2	15.3	44.4767	15.1	19.8
88	162	14.8	42.6	24.8	58.216	8.7	33.9	17.9	42.0188	20.5	39
89	166	14.2	53.4	29.4	55.0562	13	40.4	21.8	40.824	24.4	53.8
90	156	14.7	57.4	29.5	51.3937	17	40.4	22	38.3275	29.7	63.7
91	162	13.8	39.9	26.8	67.1679	3.4	36.5	19.6	49.1228	8.6	14.1
92	168	14.5	61.5	33.3	54.1463	15.7	45.8	25	40.6504	25.6	65.9
93	161	14.5	45.1	26.9	59.6452	8.1	37	20	44.3459	18	29.2
94	171	14.4	55.7	33.4	59.9641	9.9	45.8	25.1	45.0628	17.8	41.2
95	159	14.3	45.4	27.2	59.9119	8.1	37.3	20.2	44.4934	17.9	29.4
96	168	13.8	52.4	31.4	59.9237	9.4	43	23.4	44.6565	17.9	38.2
97	166	14.5	66	33.1	50.1515	20.6	45.4	24.9	37.7273	31.3	87.8
98	172	14.4	56.7	32.9	58.0247	11.6	45.1	24.7	43.5626	20.5	46.6
99	173	13.9	73.7	39	52.9172	20.2	53.5	29.6	40.1628	27.5	83.7
100	163	14.4	41	25.7	62.6829	5.9	35.1	18.6	45.3659	14.3	25.8
101	151	14.3	40	23.7	59.25	7.6	32.4	17.2	43	19	29.7
102	182	13.9	76.8	39.9	51.9531	22.2	54.6	30.1	39.1927	28.9	94.1
103	153	13.8	38.5	22.5	58.4416	7.8	30.7	16	41.5584	20.2	35.4
104	154	14.8	52.6	26.2	49.8099	16.7	35.9	19.3	36.692	31.8	68.7
105	150	14.6	39	24.4	62.5641	5.6	33.4	18	46.1538	14.3	17.6
106	155	14.6	47.8	27.3	57.113	10.4	37.4	20.4	42.6778	21.8	36.5
107	158	14.3	39.2	24.9	63.5204	5.2	34	18.1	46.1735	13.3	19.5
108	160	14.2	65.6	34.3	52.2866	18.6	47	26.2	39.939	28.4	65.9
109	168	13.8	55.1	32.3	58.6207	10.8	44.3	24.2	43.9201	19.6	43.3
110	159	14.3	54.5	30.9	56.6972	11.9	42.6	23.2	42.5688	21.9	44.8
111	169	14.9	57.7	34.6	59.9653	10.4	47.3	25.9	44.8873	18	45.1
112	162	14.8	42.6	24.8	58.216	8.7	33.9	17.9	42.0188	20.5	39
113	166	14.9	56.1	31.9	56.8627	12.6	43.5	23.9	42.6025	22.4	49
114	156	14.7	57.4	29.5	51.3937	17	40.4	22	38.3275	29.7	63.7
115	154	14.8	52.6	26.2	49.8099	16.7	35.9	19.3	36.692	31.8	68.7
116	150	14.6	39	24.4	62.5641	5.6	33.4	18	46.1538	14.3	17.6
117	155	14.6	47.8	27.3	57.113	10.4	37.4	20.4	42.6778	21.8	36.5
118	169	14.9	57.7	34.6	59.9653	10.4	47.3	25.9	44.8873	18	45.1
119	162	13.8	39.9	26.8	67.1679	3.4	36.5	19.6	49.1228	8.6	14.1
120	168	13.8	52.4	31.4	59.9237	9.4	43	23.4	44.6565	17.9	38.2
121	173	13.9	73.7	39	52.9172	20.2	53.5	29.6	40.1628	27.5	83.7
122	182	13.9	76.8	39.9	51.9531	22.2	54.6	30.1	39.1927	28.9	94.1
123	153	13.8	38.5	22.5	58.4416	7.8	30.7	16	41.5584	20.2	35.4
124	168	13.8	55.1	32.3	58.6207	10.8	44.3	24.2	43.9201	19.6	43.3
125	157	13.8	60.1	33.5	55.7404	14.3	45.8	25.4	42.2629	23.7	52.3
126	162	15.8	48.4	29.9	61.7769	7.4	41	22.3	46.0744	15.3	30.3
127	176	15.3	72.3	39.1	54.0802	18.8	53.5	29.8	41.2172	26	82.8
128	170	15.6	50.8	29.9	58.8583	9.9	40.9	22.1	43.5039	19.6	43.6
129	171	15.7	60.8	33.7	55.4276	14.7	46.1	25	41.1184	24.1	59.7
130	157.5	15.2	61.3	29.6	48.2871	20.7	40.6	22.3	36.3785	33.7	90.9
131	162	15.2	59.8	32.3	54.0134	15.4	44.4	24.4	40.8027	25.7	57.1
132	171	15.7	58.4	30.2	51.7123	17	41.4	22.3	38.1849	29.1	69
133	158	15.1	66.1	31.2	47.2012	23.4	42.7	23.5	35.5522	35.3	106.4
134	167	15	50.9	28.5	55.9921	11.9	39	20.9	41.0609	23.4	49.9
135	174	15.6	79.6	38.3	48.1156	27.2	52.4	28.7	36.0553	34.1	118.4
136	166	15.5	61	32.2	52.7869	16.7	44.3	24.4	40	27.3	62
137	173	15.4	76.3	39.8	52.1625	21.8	54.5	30.6	40.1048	28.6	87.9
138	177	15.8	58.6	35.9	61.2628	9.5	49.1	27.1	46.2457	16.1	36.6
139	170	15.1	59.9	35.6	59.4324	11.1	48.8	27.2	45.409	18.5	43
140	172	16	70.4	35.5	50.4261	21.8	48.6	26.8	38.0682	31	94.8
141	158	15.9	50.9	27.6	54.224	13	37.9	20.2	39.6857	25.6	50.9
142	170	15.8	58.7	34	57.9216	12.2	46.5	25.3	43.1005	20.8	52.3
143	163	15.9	59.9	34.8	58.0968	12.3	47.6	26.5	44.2404	20.5	45.6
144	174	15.5	53.7	31.2	58.1006	11.3	42.4	23.1	43.0168	21	49.3
145	173	15.3	58.8	32.8	55.7823	13.7	45.1	24.8	42.1769	23.4	53.6
146	161	16.1	55.8	31.8	56.9892	12.2	43.6	23.8	42.6523	21.8	44.8
147	162	16.2	50.3	27.2	54.0755	13.2	37.1	19.9	39.5626	26.3	54.2
148	165	16.1	58.6	33.8	57.6792	12.3	46.3	25.4	43.3447	20.9	46.9
149	160	16.2	53	30.2	56.9811	11.7	41.3	22.5	42.4528	22.1	48.8
150	162	16.3	40.2	27.4	68.1592	2.9	37.3	20	49.7512	7.1	12.8
151	164	15.9	52.5	30.6	58.2857	10.6	41.9	22.9	43.619	20.1	41.9
152	182	15.9	66.2	38.3	57.855	13.9	52.3	29.1	43.9577	20.9	58.6
153	159	15.9	48	28.4	59.1667	9.1	38.9	21.3	44.375	18.9	31.8
154	171	15.5	52.6	32.7	62.1673	7.9	44.7	24.6	46.7681	15	31.7
155	163	16.3	48.8	29.1	59.6311	8.8	40	21.7	44.4672	18.1	31.1
156	159	16.3	61	30.9	50.6557	18.5	42.5	23.2	38.0328	30.4	69.5
157	175	15.8	64.4	37.4	58.0745	13.1	51.3	28	43.4783	20.4	55
158	166	15.8	65.8	31.7	48.1763	22.4	43.4	23.5	35.7143	34	106
159	170	15.6	50.8	29.9	58.8583	9.9	40.9	22.1	43.5039	19.6	43.6
160	171	15.7	60.8	33.7	55.4276	14.7	46.1	25	41.1184	24.1	59.7
161	171	15.7	58.4	30.2	51.7123	17	41.4	22.3	38.1849	29.1	69
162	161.5	15.3	74.8	35.8	47.861	26	48.8	27	36.0963	34.7	120.3
163	162	15.8	48.4	29.9	61.7769	7.4	41	22.3	46.0744	15.3	30.3
164	177	15.8	58.6	35.9	61.2628	9.5	49.1	27.1	46.2457	16.1	36.6
165	170	15.8	58.7	34	57.9216	12.2	46.5	25.3	43.1005	20.8	52.3
166	164	16.9	57.5	34.2	59.4783	10.6	46.9	25.8	44.8696	18.4	42.3
167	163	16.2	47.1	30.4	64.5435	5.6	41.5	22.8	48.4076	11.8	18.8
168	166	16.7	60.3	32	53.068	16.5	43.8	23.9	39.6352	27.4	69.8
169	159	16.4	45.2	27.1	59.9558	7.9	37.3	20	44.2478	17.6	32.9
170	167	16.4	70.4	37.6	53.4091	19	51.4	28.7	40.767	27	75.7
171	171	16	56.3	34.6	61.4565	9	47.3	26.2	46.5364	15.9	33
172	172	16	70.4	35.5	50.4261	21.8	48.6	26.8	38.0682	31	94.8
173	158	15.9	50.9	27.6	54.224	13	37.9	20.2	39.6857	25.6	50.9
174	166	16.4	52.4	30.2	57.6336	11	41.4	22.7	43.3206	21	43.3
175	170	16.6	53.6	31.5	58.7687	10.4	43.2	23.3	43.4701	19.4	44.4
176	174	16.2	64.7	37.8	58.4235	12.9	51.8	28.6	44.204	20	53.5
177	162	16.4	50.3	28.5	56.66	11.3	39	21.1	41.9483	22.5	43.7
178	170	16.3	59.6	32.5	54.5302	15.2	44.4	24	40.2685	25.5	64
179	163	15.9	59.9	34.8	58.0968	12.3	47.6	26.5	44.2404	20.5	45.6
180	160	16.8	52.7	28.5	54.0797	13.7	39	21	39.8482	26	55.4
181	178	16.9	70.5	38.5	54.6099	17.8	52.7	29.4	41.7021	25.3	75.3
182	161	16.1	55.8	31.8	56.9892	12.2	43.6	23.8	42.6523	21.8	44.8
183	162	16.2	50.3	27.2	54.0755	13.2	37.1	19.9	39.5626	26.3	54.2
184	165	16.1	58.6	33.8	57.6792	12.3	46.3	25.4	43.3447	20.9	46.9
185	162	16.4	51.6	28.6	55.4264	12.3	39.3	21.4	41.4729	23.9	43.4
186	160	16.2	53	30.2	56.9811	11.7	41.3	22.5	42.4528	22.1	48.8
187	169	16.8	58.6	30.6	52.2184	16.6	42	22.9	39.0785	28.4	67.1
188	162	16.3	40.2	27.4	68.1592	2.9	37.3	20	49.7512	7.1	12.8
189	164	15.9	52.5	30.6	58.2857	10.6	41.9	22.9	43.619	20.1	41.9
190	182	15.9	66.2	38.3	57.855	13.9	52.3	29.1	43.9577	20.9	58.6
191	159	15.9	48	28.4	59.1667	9.1	38.9	21.3	44.375	18.9	31.8
192	163	16.3	48.8	29.1	59.6311	8.8	40	21.7	44.4672	18.1	31.1
193	159	16.3	61	30.9	50.6557	18.5	42.5	23.2	38.0328	30.4	69.5
194	161	16.6	71.8	32.3	44.9861	27.6	44.2	24.2	33.7047	38.5	130.9
195	177.5	16.6	74.8	38.1	50.9358	22.9	51.9	28.4	37.9679	30.6	103.3
196	166	15.8	65.8	31.7	48.1763	22.4	43.4	23.5	35.7143	34	106
197	164	16.9	57.5	34.2	59.4783	10.6	46.9	25.8	44.8696	18.4	42.3
198	166	16.7	60.3	32	53.068	16.5	43.8	23.9	39.6352	27.4	69.8
199	160	16.8	52.7	28.5	54.0797	13.7	39	21	39.8482	26	55.4
200	178	16.9	70.5	38.5	54.6099	17.8	52.7	29.4	41.7021	25.3	75.3
201	169	16.8	58.6	30.6	52.2184	16.6	42	22.9	39.0785	28.4	67.1
202	187.5	16.4	79.3	43.7	55.1072	19.5	59.8	33.3	41.9924	24.6	90.2
203	173	17.4	59.8	33.2	55.5184	14.4	45.4	24.8	41.4716	24.1	57.4
204	163	17.3	51.9	29.6	57.0328	11.4	40.5	22	42.3892	22	44.4
205	164	17.7	57.9	32.7	56.4767	13	44.9	24.6	42.487	22.4	48.7
206	166	18.3	66.9	31.2	46.6368	24.3	42.6	23.2	34.6786	36.4	119.7
207	166	18.3	66.6	33	49.5495	21.4	45.2	24.9	37.3874	32.1	83.9
208	177	18	79.7	38.4	48.1807	26.9	52.8	29.3	36.7629	33.7	118.3
209	173	17.9	59.9	32.8	54.7579	15	44.9	24.5	40.9015	25	61.5
210	159	18	58.2	30.8	52.921	15.8	42.4	23.5	40.378	27.2	55.3
211	172.5	17.7	68.7	37.4	54.4396	17.3	51.4	28.5	41.4847	25.2	72.5
212	160	17.7	52.7	31.2	59.203	9.9	42.8	23.3	44.2125	18.8	39.8
213	158	17	87.9	35.9	40.8419	38.8	49.1	27.3	31.058	44.1	188.1
214	164	17.6	61.9	34.3	55.412	14.8	47.1	26	42.0032	23.9	56.1
215	169	17.4	54.5	30.9	56.6972	12.3	42.2	23.1	42.3853	22.5	49.5
216	174	17.7	59.3	34.1	57.5042	12.6	46.7	25.5	43.0017	21.3	54
217	163	17.5	50.2	30.5	60.757	8.4	41.8	23	45.8167	16.6	29.9
218	173	17.2	62.3	34.8	55.8587	14.8	47.5	26	41.7335	23.7	65
219	170	17.2	58.8	32.5	55.2721	14.1	44.7	24.5	41.6667	23.9	53.5
220	167	17.7	68	35.6	52.3529	19.3	48.7	26.9	39.5588	28.4	74.8
221	169	17.7	54.4	32.2	59.1912	10.4	44	24.1	44.3015	19	41.5
222	168	17.8	59.8	32.3	54.0134	15.6	44.2	24.1	40.301	26.1	62.5
223	167	17.9	54.7	29.7	54.2962	13.9	40.8	22.2	40.585	25.5	56.6
224	173	17.2	70.8	37.2	52.5424	19.7	51.1	28.4	40.113	27.9	81.9
225	182	17.3	62.3	36	57.7849	13.1	49.2	27.1	43.4992	21	53.8
226	158	17.9	47.9	27.7	57.8288	9.8	38.1	20.6	43.0063	20.4	34.4
227	177	18.9	76.7	43	56.0626	17.7	59	32.8	42.764	23.1	76
228	158	18	45.5	26.2	57.5824	9.8	35.7	19.2	42.1978	21.5	37.3
229	171	18.3	59.2	33.8	57.0946	12.8	46.4	25.7	43.4122	21.6	47.6
230	171	17.8	51.9	31.5	60.6936	8.9	43	23.2	44.7013	17.2	40.2
231	164	17.7	57.9	32.7	56.4767	13	44.9	24.6	42.487	22.4	48.7
232	173	17.9	59.9	32.8	54.7579	15	44.9	24.5	40.9015	25	61.5
233	167	17.8	45.9	28.9	62.963	6.4	39.5	21.5	46.841	13.9	23
234	160	17.7	52.7	31.2	59.203	9.9	42.8	23.3	44.2125	18.8	39.8
235	174	17.7	59.3	34.1	57.5042	12.6	46.7	25.5	43.0017	21.3	54
236	167	17.7	68	35.6	52.3529	19.3	48.7	26.9	39.5588	28.4	74.8
237	169	17.7	54.4	32.2	59.1912	10.4	44	24.1	44.3015	19	41.5
238	168	17.8	59.8	32.3	54.0134	15.6	44.2	24.1	40.301	26.1	62.5
239	167	17.9	54.7	29.7	54.2962	13.9	40.8	22.2	40.585	25.5	56.6
240	170.5	18.9	64	33.5	52.3438	18.2	45.8	25.2	39.375	28.4	74.8
241	158	17.9	47.9	27.7	57.8288	9.8	38.1	20.6	43.0063	20.4	34.4
242	179.5	18.7	75.6	39.7	52.5132	21	54.6	30.4	40.2116	27.8	88.3
243	171	17.8	51.9	31.5	60.6936	8.9	43	23.2	44.7013	17.2	40.2
244	165	18.2	57.5	33.5	58.2609	11.6	45.9	25.3	44	20.2	43
245	168	18.7	52.6	30	57.0342	11.6	41	22.3	42.3954	22.1	47.3
246	166	18.3	66.9	31.2	46.6368	24.3	42.6	23.2	34.6786	36.4	119.7
247	166	18.3	66.6	33	49.5495	21.4	45.2	24.9	37.3874	32.1	83.9
248	177	18	79.7	38.4	48.1807	26.9	52.8	29.3	36.7629	33.7	118.3
249	169	18.2	54.7	30.9	56.4899	12.5	42.2	22.9	41.8647	22.9	51.2
250	159	18	58.2	30.8	52.921	15.8	42.4	23.5	40.378	27.2	55.3
251	164	18.2	80.8	34.6	42.8218	33.3	47.5	26	32.1782	41.2	159
252	175	18.7	58.1	33.6	57.8313	12.2	45.9	25.3	43.5456	21.1	49.1
253	169	18.7	56.6	32.6	57.5972	12	44.6	24.4	43.1095	21.3	50.8
254	172	18.7	56.2	32.9	58.5409	11	45.2	24.5	43.5943	19.6	45.7
255	163	18.4	53.1	26.9	50.6591	16.3	36.8	19.6	36.9115	30.8	72.3
256	168	18.9	73.5	39.5	53.7415	19.4	54.1	30.5	41.4966	26.4	75.2
257	164	18.7	58.4	31.7	54.2808	14.8	43.6	23.8	40.7534	25.3	59.4
258	149	18.7	46	26.2	56.9565	10.1	35.9	19.2	41.7391	22	38.4
259	156	18.4	44.6	27	60.5381	7.6	37	19.9	44.6188	17.1	28.8
260	158	18	45.5	26.2	57.5824	9.8	35.7	19.2	42.1978	21.5	37.3
261	171	18.3	59.2	33.8	57.0946	12.8	46.4	25.7	43.4122	21.6	47.6
262	163	18.8	58.7	32.4	55.1959	14.4	44.3	24.4	41.5673	24.5	57.5
263	160.5	18.8	59.8	30.3	50.6689	18.3	41.5	22.6	37.7926	30.6	72.1
264	160	18.7	53.1	28.4	53.484	14.3	38.8	20.9	39.3597	26.8	57.8
265	164	18.9	55.2	31.3	56.7029	12.4	42.8	23.4	42.3913	22.5	49.1
266	157	18.9	68	30.7	45.1471	26	42	23.1	33.9706	38.3	122.9
267	169	18.9	73.1	36.2	49.5212	23.7	49.4	27.2	37.2093	32.5	109.9
268	160.5	18.5	60	30.8	51.3333	17.8	42.2	23.2	38.6667	29.7	73
269	159	18.4	53.6	29.1	54.291	13.8	39.8	21.5	40.1119	25.8	58.1
270	167.5	17.9	62.6	33.8	53.9936	16.4	46.2	25.3	40.4153	26.1	67.3
271	171	18.9	64	34.4	53.75	16.9	47.1	26	40.625	26.5	67.5
272	172.5	18.1	64.7	35.4	54.7141	16.3	48.4	26.3	40.6491	25.2	69.9
273	181.5	18.6	124.8	44.1	35.3365	64.6	60.2	33.2	26.6026	51.8	282.3
274	173.5	18.3	129.1	46.7	36.1735	65.5	63.6	35.7	27.653	50.7	256
275	170.5	18.8	48.7	29.1	59.7536	8.9	39.8	21.3	43.7372	18.3	41.5
276	171	18.6	56.7	31	54.6737	14.3	42.4	23.1	40.7407	25.3	59.5
277	156.5	18.7	49.7	29	58.3501	9.8	39.9	21.8	43.8632	19.8	32.7
278	163	18.1	45.3	25.8	56.9536	10.2	35.1	18.8	41.5011	22.5	42.9
279	159	18.6	51	28	54.902	12.7	38.3	20.8	40.7843	24.9	47.4
280	161.5	18.9	49.1	27.4	55.8045	11.6	37.5	20	40.7332	23.7	49.1
281	169	18.2	54.7	30.9	56.4899	12.5	42.2	22.9	41.8647	22.9	51.2
282	164	18.2	80.8	34.6	42.8218	33.3	47.5	26	32.1782	41.2	159
283	184	18.1	75.7	40.8	53.897	19.7	56	31.4	41.4795	26	81.2

## Sheet: VG
1. Name	BH cm	Age years	BM kg	TBW l	TBW %	BF kg	FFM kg	SMM kg	SMM %	BF %	VFA (cm2)
1	155	12.8	38.3	24.6	64.2298	4.7	33.6	17.8	46.4752	12.2	21.1
2	156	11.3	50.4	29.1	57.7381	10.8	39.6	21.4	42.4603	21.3	44.2
3	167	12.9	52.1	30.4	58.3493	10.5	41.6	22.5	43.1862	20.2	45
4	170	11.9	46	30.2	65.6522	5.1	40.9	22.2	48.2609	11	20.8
5	148	11.3	32.2	20.6	63.9752	4	28.2	14.6	45.3416	12.3	17.5
6	164	12.6	48.6	30.4	62.5514	7.3	41.3	22.3	45.8848	15	33.2
7	164	12.6	63.4	32.7	51.5773	18.5	44.9	24.3	38.3281	29.1	80
8	159.5	11.9	47.3	27	57.0825	10.4	36.9	19.8	41.8605	22	43.9
9	162	12.9	39.5	24.9	63.038	5.5	34	18	45.5696	13.8	24.7
10	159.5	11.3	50.2	29.7	59.1633	9.6	40.6	21.9	43.6255	19.2	39.5
11	157	12.9	44.5	27.1	60.8989	7.5	37	19.7	44.2697	16.9	34.3
12	165	11.9	61.8	37.4	60.5178	10.8	51	28.5	46.1165	17.4	43.8
13	160.5	12.5	47.8	30.7	64.2259	5.8	42	22.7	47.4895	12.2	24.7
14	150.5	12.6	49.3	27.8	56.3895	11.2	38.1	20.3	41.1765	22.8	45
15	149	12.8	38.3	23.6	61.6188	5.9	32.4	17	44.3864	15.5	23.4
16	159.5	12.1	41.7	27.3	65.4676	4.3	37.4	20.1	48.2014	10.4	16.4
17	165	12.5	53.4	30.1	56.367	12.3	41.1	22	41.1985	23.1	53.2
18	159.5	12.7	53.4	26.1	48.8764	17.7	35.7	19	35.5805	33.2	83.1
19	154	11.8	39.2	25	63.7755	5.1	34.1	17.9	45.6633	13	23.7
20	161.5	12.8	47.2	30	63.5593	6.1	41.1	22.4	47.4576	12.8	22
21	143	12.5	32.2	21.5	66.7702	2.8	29.4	15.7	48.7578	8.6	5.2
22	162.5	12.8	61.4	32.4	52.7687	17	44.4	24.3	39.5765	27.7	65.4
23	150	12.2	44.1	25.3	57.3696	9.4	34.7	18.4	41.7234	21.2	38.5
24	153.5	12.3	36.4	24	65.9341	3.6	32.8	17.2	47.2527	10	17
25	165	11.9	56.2	34.7	61.7438	8.9	47.3	26	46.2633	15.8	36
26	151.5	12.1	33.1	21.4	64.6526	3.8	29.3	15.2	45.9215	11.5	17.7
27	156	12.7	54.7	28	51.1883	16.5	38.2	20.6	37.66	30.1	63.8
28	172.5	13.6	53.9	33.1	61.41	8.8	45.1	24.5	45.4545	16.3	41.6
29	170	13.7	51	30.5	59.8039	9.2	41.8	22.8	44.7059	18.1	37.3
30	154.5	13.5	36.1	23.7	65.651	3.8	32.3	17.1	47.3684	10.4	15.7
31	170.5	13.6	60.3	38.4	63.6816	7.8	52.5	29	48.0929	12.9	32.9
32	171	13.8	51.5	33.4	64.8544	6.1	45.4	24.8	48.1553	11.8	27.7
33	164.5	13.6	58.2	34.6	59.4502	10.8	47.4	26.1	44.8454	18.5	46.1
34	163	13.3	45.6	27.8	60.9649	7.4	38.2	20.5	44.9561	16.2	29
35	162.5	13.7	42.7	27.9	65.3396	4.6	38.1	20.5	48.0094	10.7	19.9
36	169.5	13.9	62	35.3	56.9355	13.7	48.3	26.3	42.4194	22.1	62.9
37	153.5	13.4	47.3	29	61.3108	7.7	39.6	21.7	45.8774	16.3	27.1
38	170	13.7	44.4	29.9	67.3423	3.7	40.7	22.1	49.7748	8.3	14.5
39	162.5	13.3	68.1	36.1	53.0103	18.7	49.4	27.5	40.3818	27.4	73.5
40	162.5	13.5	45.4	29	63.8767	5.7	39.7	21.3	46.9163	12.5	26.1
41	164.5	13.9	39.8	27.1	68.0905	3	36.8	19.6	49.2462	7.6	14.4
42	173	13.8	66.5	37	55.6391	15.8	50.7	28	42.1053	23.8	70.1
43	170	13.2	47.5	29.2	61.4737	7.6	39.9	21.3	44.8421	15.9	35.7
44	157	13.6	47.3	28.8	60.8879	8	39.3	21.4	45.2431	16.8	30.4
45	173	13.1	54.7	33	60.3291	9.5	45.2	24.5	44.7898	17.4	40.4
46	156	13.1	42.7	26.6	62.2951	6.3	36.4	19.5	45.6674	14.8	25.6
47	163	13.6	52	31.2	60	9.5	42.5	23.1	44.4231	18.2	41.8
48	160.5	13.8	56.6	31.1	54.947	14	42.6	23.2	40.9894	24.7	57.1
49	170.5	13.4	65.2	37.2	57.0552	14.1	51.1	28.3	43.4049	21.7	58
50	165.5	13.3	46.1	29.4	63.7744	6.1	40	21.7	47.0716	13.3	24.4
51	173.5	13	62.1	36.3	58.4541	12.5	49.6	27.2	43.8003	20.1	54.5
52	159	13.8	49.4	30.7	62.1457	7.4	42	22.8	46.1538	15	29.6
53	168	13.4	56.7	34.6	61.0229	9.4	47.3	25.9	45.679	16.6	41.8
54	169.5	13.8	54.9	32.6	59.3807	10.4	44.5	24.3	44.2623	18.9	46.5
55	167	13.4	58.2	35.4	60.8247	9.7	48.5	26.8	46.0481	16.7	39.1
56	159	13.4	45.5	27.8	61.0989	7.2	38.3	20.6	45.2747	15.9	27.3
57	162	13.1	60.4	34.2	56.6225	13.5	46.9	25.5	42.2185	22.4	54.8
58	179	14.8	56.8	38	66.9014	5.2	51.6	28.4	50	9.1	23.3
59	175	14.1	48.1	33	68.6071	3.1	45	24.5	50.9356	6.5	12.8
60	174.5	14.2	56.9	36.2	63.6204	7.6	49.3	27.4	48.1547	13.3	30.3
61	182.5	14.3	69.5	40.6	58.4173	14	55.5	30.4	43.741	20.2	64
62	170	14.3	55.3	34.5	62.387	8.1	47.2	25.7	46.4738	14.7	37.2
63	170.5	14.1	47.8	31.2	65.272	5.5	42.3	23.1	48.3264	11.4	22
64	171	14.6	55.8	33.1	59.319	10.5	45.3	24.7	44.2652	18.9	44.7
65	174	14.3	60.8	34.8	57.2368	13.1	47.7	26	42.7632	21.5	58.2
66	173	14.4	62.5	36.8	58.88	12.2	50.3	27.6	44.16	19.5	50.2
67	171	14.1	48.7	30.1	61.807	7.7	41	22.2	45.5852	15.7	31.3
68	174	14.3	67.8	36	53.0973	18.3	49.5	27.3	40.2655	27	70.9
69	171	14.7	64.8	37.2	57.4074	13.8	51	28.3	43.6728	21.3	53.6
70	176	15.3	57.7	35.7	61.8718	9.1	48.6	26.5	45.9272	15.7	41.5
71	174	15.1	53.2	32.6	61.2782	8.8	44.4	24.4	45.8647	16.5	34.9
72	171.5	15.4	64.2	37	57.6324	13.6	50.6	28.3	44.081	21.3	53.9
73	162.5	15.5	49.8	29.3	58.8353	9.8	40	21.6	43.3735	19.7	41.1
74	171.5	15.7	60.1	37.7	62.7288	8.4	51.7	28.7	47.7537	14	33.3
75	174	15.3	65.1	38.5	59.1398	12.5	52.6	29.4	45.1613	19.2	53.2
76	151.5	16.8	47.7	27.5	57.652	10.1	37.6	20.4	42.7673	21.3	37.8
77	184	15.6	71.2	41.1	57.7247	15	56.2	31.3	43.9607	21.1	67.4
78	167.5	16.4	54.1	34.7	64.1405	6.6	47.5	26	48.0591	12.3	26.8
79	167	15.2	62.3	35.7	57.3034	13.3	49	27.2	43.6597	21.3	50.4
80	175	15.8	61.9	37.8	61.0662	10.2	51.7	28.5	46.042	16.5	45.5
81	173.5	16.6	70.1	42	59.9144	12.6	57.5	32.1	45.7917	18	54.8
82	175.5	16.7	62.6	33.9	54.1534	16.3	46.3	25.4	40.5751	26	71.7
83	177	16.9	63.5	38.9	61.2598	10.2	53.3	29.6	46.6142	16.1	43.9
84	171.5	16.8	70.5	38.8	55.0355	17.5	53	29.3	41.5603	24.8	73.2
85	180.5	16.5	57.8	37.9	65.5709	6	51.8	29	50.173	10.3	20.4
86	174	16.7	59.6	35.1	58.8926	11.6	48	26.7	44.7987	19.4	44.2
87	169.5	16.7	52.6	32.9	62.5475	7.5	45.1	24.9	47.3384	14.3	27.5
88	176	16.4	69.9	42	60.0858	12.5	57.4	32	45.7797	17.9	55.6
89	166.5	16.9	62.7	33.4	53.2695	16.9	45.8	25.3	40.3509	26.9	66.8
90	176	16.6	69.5	37.9	54.5324	17.3	52.2	29.1	41.8705	24.9	67.8
91	170	16.4	65.3	37.4	57.2741	14	51.3	28.3	43.3384	21.5	60.1
92	170.5	16.5	65.1	39.5	60.6759	10.9	54.2	30.3	46.5438	16.7	43.6
93	172	16.4	67.8	39.9	58.8496	13.1	54.7	30.5	44.9853	19.4	55
94	174.5	16.3	65.8	40.2	61.0942	10.5	55.3	30.9	46.9605	16	39.6
95	165	15	45	27.7	61.5556	7.1	37.9	20.6	45.7778	15.8	27.1
96	170	15.1	49	29.1	59.3878	9.2	39.8	21.6	44.0816	18.9	38.3
97	166	15.7	46.4	28.7	61.8534	7	39.4	21.5	46.3362	15.1	24.3
98	166	15.7	46.4	28.7	61.8534	7	39.4	21.5	46.3362	15.1	24.3
99	175	15.8	64.4	37.4	58.0745	13.1	51.3	28	43.4783	20.4	55
100	165	16.8	48.9	29.3	59.9182	8.9	40	21.6	44.1718	18.1	36.3
101	175	18.9	73.5	41.2	56.0544	16.9	56.6	31.8	43.2653	23	70.4
102	165.5	17.3	62.8	37	58.9172	12.2	50.6	28	44.586	19.4	48
103	170.5	17.3	61.6	33.9	55.0325	15	46.6	25.7	41.7208	24.3	63.6
104	168.5	19	54.7	32.8	59.9634	9.7	45	24.6	44.9726	17.7	40.3
105	183.5	18.3	66.1	40.8	61.7247	10.4	55.7	31	46.8986	15.7	44.2
106	164.5	18.2	56.3	35.2	62.5222	8.3	48	26.6	47.2469	14.7	32.4
107	168	18.1	65.1	35.4	54.3779	16.6	48.5	26.9	41.321	25.5	68.4
108	172	17	66.5	39.8	59.8496	12.1	54.4	30.4	45.7143	18.2	47.4
109	176	19	65.7	38.6	58.7519	12.6	53.1	29.7	45.2055	19.2	50
110	172	17.9	57.5	34.6	60.1739	10	47.5	26.5	46.087	17.4	38.2
111	172	17.9	57.5	34.6	60.1739	10	47.5	26.5	46.087	17.4	38.2
112	171.5	17.2	61.6	36.7	59.5779	11.3	50.3	27.8	45.1299	18.3	44.4
113	172	17.6	62.2	35.8	57.5563	13.5	48.7	26.8	43.0868	21.6	58.7
114	161.5	18.6	48.2	27.1	56.2241	11.1	37.1	20.1	41.7012	23	41.8
115	173.5	18.3	68.6	40.6	59.1837	12.9	55.7	31.3	45.6268	18.8	50.7
116	178.5	18.8	71.3	38.9	54.5582	17.9	53.4	29.6	41.5147	25.2	74.8
117	168	17.6	57.4	33.7	58.7108	11.2	46.2	25.8	44.9477	19.5	42.9
118	175	18.3	64.5	37.8	58.6047	12.8	51.7	28.7	44.4961	19.8	51.5
119	168	19	57.6	34	59.0278	10.9	46.7	25.8	44.7917	18.9	41.8
120	169	17.9	62.2	36.7	59.0032	11.9	50.3	28.2	45.3376	19.1	44.8
121	171.5	18.8	61.7	37.1	60.1297	10.9	50.8	28.3	45.8671	17.7	43.9
122	168.5	17.4	62.7	36.8	58.6922	11.9	50.8	28.4	45.2951	19	42.8
123	178.5	17.5	57.3	35.4	61.7801	8.7	48.6	26.8	46.7714	15.1	32.7
124	173	18.3	64.7	35.1	54.2504	16.6	48.1	26.3	40.6491	25.7	73.2
125	171	18.5	55.2	32.3	58.5145	10.9	44.3	24.1	43.6594	19.8	44.7
126	172	17	66.2	38.6	58.3082	13.1	53.1	29.6	44.713	19.8	51.6
127	167	17.8	45.9	28.9	62.963	6.4	39.5	21.5	46.841	13.9	23
128	171	17.9	54.3	33	60.7735	9.2	45.1	24.7	45.488	17	37.5
129	171	17.9	54.3	33	60.7735	9.2	45.1	24.7	45.488	17	37.5
130	166.5	18.4	54	32.8	60.7407	9	45	24.8	45.9259	16.8	35.4
